# Supplementary material for: Evaluation of Multilocus Sequence Typing of Cyclospora cayetanensis based on microsatellite markers
Source: PubMed Central journal article supplement (PMC6354607; doi:10.1051/parasite/2019004), 2019-01-31
Supplement: parasite-26-3-olm.pdf [file parasite-26-3-olm.pdf]

**Supplementary Table S1. PCR primer sequences used to amplify the MLST markers CYC3, CYC13, CYC21 and CYC22 [4].**

| <b>locus</b> | <b>Outer primer sequences (5' to 3')</b>                 | <b>Inner primer sequences (5' to 3')</b>                 |
|--------------|----------------------------------------------------------|----------------------------------------------------------|
| CYC3         | F1: GAAGATGAAGCGTTGGTACG<br>R1: TACCGCTGCTGGAGTGCAT      | F2: TTGTGCATGGCACCCAATGC<br>R2: CCAGACAGTAGTTCGTGTCTT    |
| CYC13        | F1: TTGGAGCAGGACGAGTTTCG<br>R1: ATGGAAGCGGCTATGAAATTGG   | F2: CCTCGGAGTCCTCTGAGTG<br>R2: AGCCGTCGCAGTGTGTAGCA      |
| CYC21        | F1: TAGTGCGACTGCGACATG<br>R1: GCACCTTGCTGATGAGGCA        | F2: CTAAGGCTGTCTTGAGCGG<br>R2: CGCCACATGCTTCGTATAC       |
| CYC22        | F1: CACTATGCCGTGTGACACGT<br>R1: GTAGATTTGCAAGAACTCATGCTA | F2: ATAGTATTCAGGCGCAAATAAG<br>R2: GAGGCTTTCCAAAGGTCTAGTT |

**Supplementary Table S2. Epidemiologic information<sup>1</sup> and typing results for 58 stool specimens from 54 patients**

| Collection location <sup>2</sup><br>and year | Epidemiologic linkage to a cluster<br>or outbreak (vehicle and source,<br>if both were identified) <sup>3</sup> | Specimen ID                                  | International travel<br>during 2-week period<br>before symptom onset <sup>4</sup> | Sequence type |             |
|----------------------------------------------|-----------------------------------------------------------------------------------------------------------------|----------------------------------------------|-----------------------------------------------------------------------------------|---------------|-------------|
|                                              |                                                                                                                 |                                              |                                                                                   | Locus CYC21   | Locus CYC22 |
| Guatemala 1997                               | No                                                                                                              | HCGM011_97 <sup>5</sup>                      | Not applicable                                                                    | C2            | -           |
| Rhode Island 1997                            | Multistate outbreak (raspberries<br>from Guatemala) [6]                                                         | HCRI001_97 <sup>5</sup>                      | No                                                                                | C2            | C1          |
| New York 2001                                | Florida outbreak [2]                                                                                            | HCNY016_01 <sup>5</sup>                      | No                                                                                | C2            | C1          |
| China 2011                                   | Unknown                                                                                                         | CHN_HEN01                                    | Not applicable                                                                    | C1            | C6          |
| Florida 2013                                 | Unknown                                                                                                         | HCFL747_13 <sup>5</sup>                      | Unknown                                                                           | C5            | C2          |
| Iowa 2013 <sup>6</sup>                       | Unknown                                                                                                         | HCIA002_13 <sup>5</sup>                      | Unknown                                                                           | C5            | C3mixed     |
|                                              | Unknown                                                                                                         | HCIA003_13 <sup>5</sup>                      | Unknown                                                                           | C5            | C3mixed     |
|                                              | Unknown                                                                                                         | HCIA004_13                                   | Unknown                                                                           | C5            | C3mixed     |
|                                              | Unknown                                                                                                         | HCIA006_13                                   | Unknown                                                                           | C5            | C3mixed     |
| Texas 2013 <sup>6</sup>                      | Unknown                                                                                                         | HCTX119_13 <sup>5</sup> (41405) <sup>7</sup> | Unknown                                                                           | C2            | C1          |
|                                              | Unknown                                                                                                         | HCTX135_13 <sup>5</sup> (41407) <sup>7</sup> | Unknown                                                                           | C2            | C3mixed     |
|                                              | Unknown                                                                                                         | HCTX363_13 <sup>5</sup> (41409) <sup>7</sup> | Unknown                                                                           | C2            | C3mixed     |
|                                              | Unknown                                                                                                         | HCTX141_13 <sup>5</sup> (41410) <sup>7</sup> | Unknown                                                                           | C2            | C3mixed     |
|                                              | Unknown                                                                                                         | HCTX120_13 <sup>5</sup> (41411) <sup>7</sup> | Unknown                                                                           | C5            | C3mixed     |
| Indonesia 2014                               | Unknown                                                                                                         | HCJK001_14 <sup>5</sup>                      | Not applicable                                                                    | C2            | C3          |

|                     |                                                                       |                         |                |     |         |
|---------------------|-----------------------------------------------------------------------|-------------------------|----------------|-----|---------|
| Maine 2014          | Maine temporospatial cluster                                          | HCME548_14 <sup>5</sup> | No             | C2  | C2      |
|                     |                                                                       | HCME550_14 <sup>5</sup> | No             | C2  | C2      |
|                     |                                                                       | HCME552_14 <sup>5</sup> | No             | C2  | C2      |
| Michigan 2014       | Michigan conference-associated cluster [2]                            | HCMI029_14 <sup>5</sup> | No             | C16 | C1      |
|                     |                                                                       | HCMI030_14 <sup>5</sup> | Unknown        | C3  | C2      |
|                     |                                                                       | HCMI031_14              | No             | C2  | -       |
|                     |                                                                       | HCMI039_14 <sup>5</sup> | Unknown        | C16 | C3mixed |
|                     |                                                                       | HCMI040_14              | No             | -   | -       |
| Pennsylvania 2014   |                                                                       | HCPA556_14              | No             | C16 | C3mixed |
| South Carolina 2014 | South Carolina temporospatial cluster [2]                             | HCSC052_14 <sup>5</sup> | No             | C2  | C3mixed |
|                     |                                                                       | HCSC053_14 <sup>5</sup> | No             | C2  | C3mixed |
|                     |                                                                       | HCSC054_14              | No             | C2  | -       |
| Texas 2014          | No                                                                    | HCTX535_14 <sup>5</sup> | No             | C3  | C1      |
|                     | No (two specimens from same patient)                                  | HCTX539_14              | Cancun, Mexico | C16 | C2      |
|                     |                                                                       | HCTX540_14 <sup>5</sup> | Cancun, Mexico | C16 | C2      |
|                     | Texas restaurant-associated cluster 2014-A (cilantro from Mexico) [2] | HCTX543_14 <sup>5</sup> | No             | C2  | C4      |
|                     | No (two specimens from same patient)                                  | HCTX551_14              | No             | -   | -       |
|                     |                                                                       | HCTX552_14              | No             | -   | -       |
|                     | No (three specimens from same patient)                                | HCTX554_14              | No             | C2  | C4      |
| HCTX555_14          |                                                                       | No                      | C2             | C4  |         |

|               |                                               |                         |                                  |    |         |
|---------------|-----------------------------------------------|-------------------------|----------------------------------|----|---------|
|               |                                               | HCTX556_14 <sup>5</sup> | No                               | C2 | C4      |
|               | No                                            | HCTX560_14              | Puerto Vallarta, Mexico          | C2 | C2      |
|               | Texas restaurant-associated cluster<br>2014-B | HCTX592_14              | No                               | C3 | C4      |
|               | No                                            | HCTX697_14              | Mexico (region not<br>specified) | C2 | C1      |
| Texas 2015    | Texas business-associated cluster             | HCTX204_15              | Cozumel, Mexico                  | C3 | C3mixed |
|               |                                               | HCTX205_15              | No                               | C3 | C3mixed |
|               |                                               | HCTX538_15              | No                               | C3 | C3mixed |
|               | No                                            | HCTX227_15              | Playa del Carmen, Mexico         | C2 | C3mixed |
|               | No                                            | HCTX230_15              | Riviera Maya, Mexico             | C2 | C2      |
|               | No                                            | HCTX551_15              | Cancun, Mexico                   | C2 | C3mixed |
|               | Texas restaurant-associated cluster           | HCTX353_15 <sup>5</sup> | No                               | -  | -       |
|               | No                                            | HCTX355_15              | Riviera Maya, Mexico             | C2 | C3mixed |
|               | No                                            | HCTX199_15              | Playa del Carmen, Mexico         | C8 | C1      |
| Virginia 2015 | Unknown                                       | HCVA002_15              | Unknown                          | -  | C1      |
| TX 2016       | No                                            | HCTX500_16              | No                               | -  | -       |
|               | No                                            | HCTX503_16              | Cancun, Mexico                   | C8 | C2      |
|               | No                                            | HCTX504_16              | Playa del Carmen, Mexico         | C2 | C3mixed |
|               | No                                            | HCTX462_16              | Mexico (region not<br>specified) | C2 | C3mixed |

|                                     |            |                        |    |         |
|-------------------------------------|------------|------------------------|----|---------|
| No                                  | HCTX468_16 | Cancun, Mexico         | C2 | C3mixed |
| Texas restaurant-associated cluster | HCTX471_16 | No                     | C2 | C1      |
| [2]                                 | HCTX474_16 | No                     | C2 | C1      |
| No                                  | HCTX475_16 | Cancun, Mexico         | C2 | C3mixed |
| No                                  | HCTX493_16 | Puerto Morelos, Mexico | C2 | C3mixed |

<sup>1</sup>The epidemiologic information provided in the table reflects what was submitted to CDC as part of surveillance or outbreak-related activities for cyclosporiasis.

<sup>2</sup>The collection location was not necessarily the same as the place of exposure to *C. cayetanensis*.

<sup>3</sup>The terminology temporospatial cluster is used here for cases that were not linked to a particular establishment or event but were temporally and geographically clustered.

<sup>4</sup>Because U.S. patients with a history of international travel may have spent part of the 2-week period before illness onset in the United States, the specified travel destination is not necessarily where they became infected.

<sup>5</sup>Specimen was included in the nested-PCR evaluation.

<sup>6</sup>Although foodborne outbreaks of cyclosporiasis were documented in Iowa and Texas in 2013 [1, 2], CDC did not receive information regarding whether the specimens listed here were obtained from patients with outbreak- or travel-associated cases.

<sup>7</sup>The 5-digit number in parentheses constitutes the specimen ID used by Guo et al. [4].
